# Supplementary material
Source: PubMed Central journal article supplement (PMC7547885)

*Supplementary Information for*

**N-Carboxyanhydride-Mediated Fatty Acylation of Amino Acids and Peptides for Functionalization of Protocell Membranes**

Enver Cagri Izgu, Anders Björkbom, Neha P. Kamat, Victor S. Lelyveld, Weicheng Zhang, Tony Z. Jia, and Jack W. Szostak

**Table of Contents**

|                                                                                              |         |
|----------------------------------------------------------------------------------------------|---------|
| 1. General Methods                                                                           | S2      |
| 2. Analysis of Peptide Formation Reactions                                                   | S3–S5   |
| 3. Mechanistic insights into the acylation of amino acids and peptides formed <i>in situ</i> | S6–S8   |
| 4. Hydrolysis of Val-NCA                                                                     | S9      |
| 5. Standard curves of FRET efficiencies                                                      | S9      |
| 6. Synthesis of <i>N</i> <sup>α</sup> -Octanoyl-L-valine                                     | S10     |
| 7. Synthesis of <i>N</i> <sup>α</sup> -Oleoyl-L-tryptophan                                   | S10–S11 |
| 8. Synthesis of Octanoic-1,1- <sup>18</sup> O <sub>2</sub> acid.                             | S11–S12 |
| 9. Synthesis of <i>N</i> <sup>α</sup> -Oleoyl-L-arginine                                     | S13     |
| 10. References for Supplementary Information                                                 | S13     |
| 11. <sup>1</sup> H and <sup>13</sup> C NMR Spectra                                           | S14–S20 |

## General Methods

Anhydrous acetonitrile was purchased from Glen Research (Sterling, VA). Anhydrous dimethylformamide (DMF) and dichloromethane ( $\text{CH}_2\text{Cl}_2$ ), amino acids (AAs), oleoyl chloride, and 4-(2-hydroxyethyl)-1-piperazinepropanesulfonic acid (EPPS) were purchased from Sigma-Aldrich (St. Louis, MO). Oleic acid and octanoic acid were purchased from Nu-Chek Prep, Inc (Elysian, MN). Octanenitrile was purchased from Alfa-Aesar (Ward Hill, MA) and  $\text{H}_2^{18}\text{O}$  was purchased from Cambridge Isotope Laboratories (Andover, MA). These reagents were used without further purification unless noted. Purification of the synthesized molecules was performed using a Teledyne Isco combiflash instrument equipped with either a silica gel column or a C18Aq high performance RediSep<sup>®</sup> column. Nuclear Magnetic Resonance (NMR) spectroscopic analyses were carried out on either a Varian INOVA 400 MHz or a Bruker Ascend 400 MHz spectrometer. Chemical shifts ( $\delta$ ) for  $^1\text{H}$  NMR spectra were referenced to TMS at  $\delta = 0.00$  ppm, or to  $\text{CHD}_2\text{OD}$  at  $\delta = 3.31$  ppm.  $^{13}\text{C}$  NMR spectra were referenced to  $\text{CDCl}_3$  at  $\delta = 77.23$  ppm, or to  $\text{CD}_3\text{OD}$  at  $\delta = 49.15$  ppm. The following abbreviations were used to describe NMR resonances: s (singlet), d (doublet), t (triplet), q (quartet), quin (quintet), m (multiplet), br (broad), and nfom (non-first order multiplet). Coupling constants ( $J$ ) were reported in Hz. Low-resolution mass spectrometry (LRMS) analyses were performed using a Bruker Daltonics Esquire 6000 mass spectrometer. Liquid chromatography followed by high-resolution mass spectrometry (LC-HRMS) was carried out on an Agilent 6520 Q-TOF or an Agilent 6230 TOF LC/MS-MS instrument (for further details see *Methods* in the main text). UV measurements were conducted on an Amersham Biosciences, Ultraspec 3100-pro UV/VIS spectrophotometer. Membrane growth assays and microscopy of RNA-membrane localization were performed as described in *Methods*.

**Table S1.** Oligomerization products observed for the reaction of Val-NCA with the specified AA substrates in the presence of either oleic acid vesicles or octanoic acid. Typical reaction conditions: 0.04 mmoles of Val-NCA (suspension) in 2 mL reaction volume, 20 mM AA, 20 mM fatty acid and 300 mM EPPS buffer at an initial pH of 8.5–8.8. The pH of the reaction mixtures drops by up to 0.3 units during the course of the experiments. Aliquots, which were taken at the 24h time point, were diluted 1000 fold before being injected into the LC-HRMS instrument.

| Entry | AA      | Fatty acid: oleic acid     |                                | Fatty acid: octanoic acid  |                               |
|-------|---------|----------------------------|--------------------------------|----------------------------|-------------------------------|
|       |         | 2                          | OI-3                           | 2                          | Oc-3                          |
| 1     | Trp (W) | V <sub>n</sub> W (n = 1–6) | OI-V <sub>n</sub> W (n = 0–3)  | V <sub>n</sub> W (n = 1–6) | Oc-V <sub>n</sub> W (n = 0–5) |
| 2     | Arg (R) | V <sub>n</sub> R (n = 1–5) | OI-V <sub>n</sub> R (n = 0–4)  | V <sub>n</sub> R (n = 1–3) | Oc-V <sub>n</sub> R (n = 0–3) |
| 3     | Val (V) | V <sub>n</sub> (n = 2–8)   | OI-V <sub>n</sub> (n = 1–6)    | V <sub>n</sub> (n = 2–8)   | Oc-V <sub>n</sub> (n = 1–6)   |
| 4     | His (H) | V <sub>n</sub> H (n = 1–5) | OI-V <sub>n</sub> H (n = 0–5)  | V <sub>n</sub> H (n = 1–5) | Oc-V <sub>n</sub> H (n = 0–5) |
| 5     | Lys (K) | V <sub>n</sub> K (n = 1–5) | OI-K                           | V <sub>n</sub> K (n = 1–4) | Oc-V <sub>n</sub> K (n = 0–3) |
| 6     | Gln (Q) | V <sub>n</sub> Q (n = 1–5) | OI-V <sub>n</sub> Q (n = 0–5)* | V <sub>n</sub> Q (n = 2–5) | Oc-V <sub>n</sub> Q (n = 0–5) |
| 7     | Asn (N) | V <sub>n</sub> N (n = 2–6) | OI-V <sub>n</sub> N (n = 0–5)  | V <sub>n</sub> N (n = 2–5) | Oc-V <sub>n</sub> N (n = 0–4) |

\*OI-V<sub>3</sub>Q was not observed

**Table S2.** HRMS Analysis of the W-containing products outlined in entry 1, Table S1. Overlay of HRMS spectra are presented in the main text.

| A. Oleoylated W-containing Products                                                             |           |          |             | B. Octanoylated W-containing Products                                                           |           |          |             |
|-------------------------------------------------------------------------------------------------|-----------|----------|-------------|-------------------------------------------------------------------------------------------------|-----------|----------|-------------|
| Molecular Formula                                                                               | Calc. m/z | Obs. m/z | Error (ppm) | Molecular Formula                                                                               | Calc. m/z | Obs. m/z | Error (ppm) |
| OI-W: C <sub>29</sub> H <sub>43</sub> N <sub>2</sub> O <sub>3</sub> <sup>-</sup>                | 467.3279  | 467.3278 | -0.2        | Oc-W: C <sub>16</sub> H <sub>20</sub> N <sub>3</sub> O <sub>3</sub> <sup>-</sup>                | 329.1871  | 329.1873 | 0.7         |
| OI-VW: C <sub>34</sub> H <sub>52</sub> N <sub>3</sub> O <sub>4</sub> <sup>-</sup>               | 566.3963  | 566.3967 | 0.7         | Oc-VW: C <sub>21</sub> H <sub>29</sub> N <sub>4</sub> O <sub>4</sub> <sup>-</sup>               | 428.2555  | 428.2555 | <0.1        |
| OI-V <sub>2</sub> W: C <sub>39</sub> H <sub>61</sub> N <sub>4</sub> O <sub>5</sub> <sup>-</sup> | 665.4647  | 665.4658 | 1.6         | Oc-V <sub>2</sub> W: C <sub>26</sub> H <sub>38</sub> N <sub>5</sub> O <sub>5</sub> <sup>-</sup> | 527.3239  | 527.3242 | 0.6         |
| OI-V <sub>3</sub> W: C <sub>44</sub> H <sub>70</sub> N <sub>5</sub> O <sub>6</sub> <sup>-</sup> | 764.5332  | 764.5335 | 0.4         | Oc-V <sub>3</sub> W: C <sub>31</sub> H <sub>47</sub> N <sub>6</sub> O <sub>6</sub> <sup>-</sup> | 626.3923  | 626.3917 | -1.0        |
|                                                                                                 |           |          |             | Oc-V <sub>4</sub> W: C <sub>36</sub> H <sub>56</sub> N <sub>7</sub> O <sub>7</sub> <sup>-</sup> | 725.4607  | 725.4607 | <0.1        |
|                                                                                                 |           |          |             | Oc-V <sub>5</sub> W: C <sub>41</sub> H <sub>65</sub> N <sub>8</sub> O <sub>8</sub> <sup>-</sup> | 824.5291  | 824.5301 | 1.2         |

  

| C. V <sub>n</sub> W Peptides                                                                 |           |          |             |
|----------------------------------------------------------------------------------------------|-----------|----------|-------------|
| Molecular Formula                                                                            | Calc. m/z | Obs. m/z | Error (ppm) |
| VW: C <sub>16</sub> H <sub>20</sub> N <sub>3</sub> O <sub>3</sub> <sup>-</sup>               | 302.1510  | 302.1503 | -2.4        |
| V <sub>2</sub> W: C <sub>21</sub> H <sub>29</sub> N <sub>4</sub> O <sub>4</sub> <sup>-</sup> | 401.2194  | 401.2184 | -2.6        |
| V <sub>3</sub> W: C <sub>26</sub> H <sub>38</sub> N <sub>5</sub> O <sub>5</sub> <sup>-</sup> | 500.2878  | 500.2867 | -2.3        |
| V <sub>4</sub> W: C <sub>31</sub> H <sub>47</sub> N <sub>6</sub> O <sub>6</sub> <sup>-</sup> | 599.3563  | 599.3556 | -1.1        |
| V <sub>5</sub> W: C <sub>36</sub> H <sub>56</sub> N <sub>7</sub> O <sub>7</sub> <sup>-</sup> | 698.4247  | 698.4255 | 1.2         |
| V <sub>6</sub> W: C <sub>41</sub> H <sub>65</sub> N <sub>8</sub> O <sub>8</sub> <sup>-</sup> | 797.4931  | 797.4931 | <0.1        |

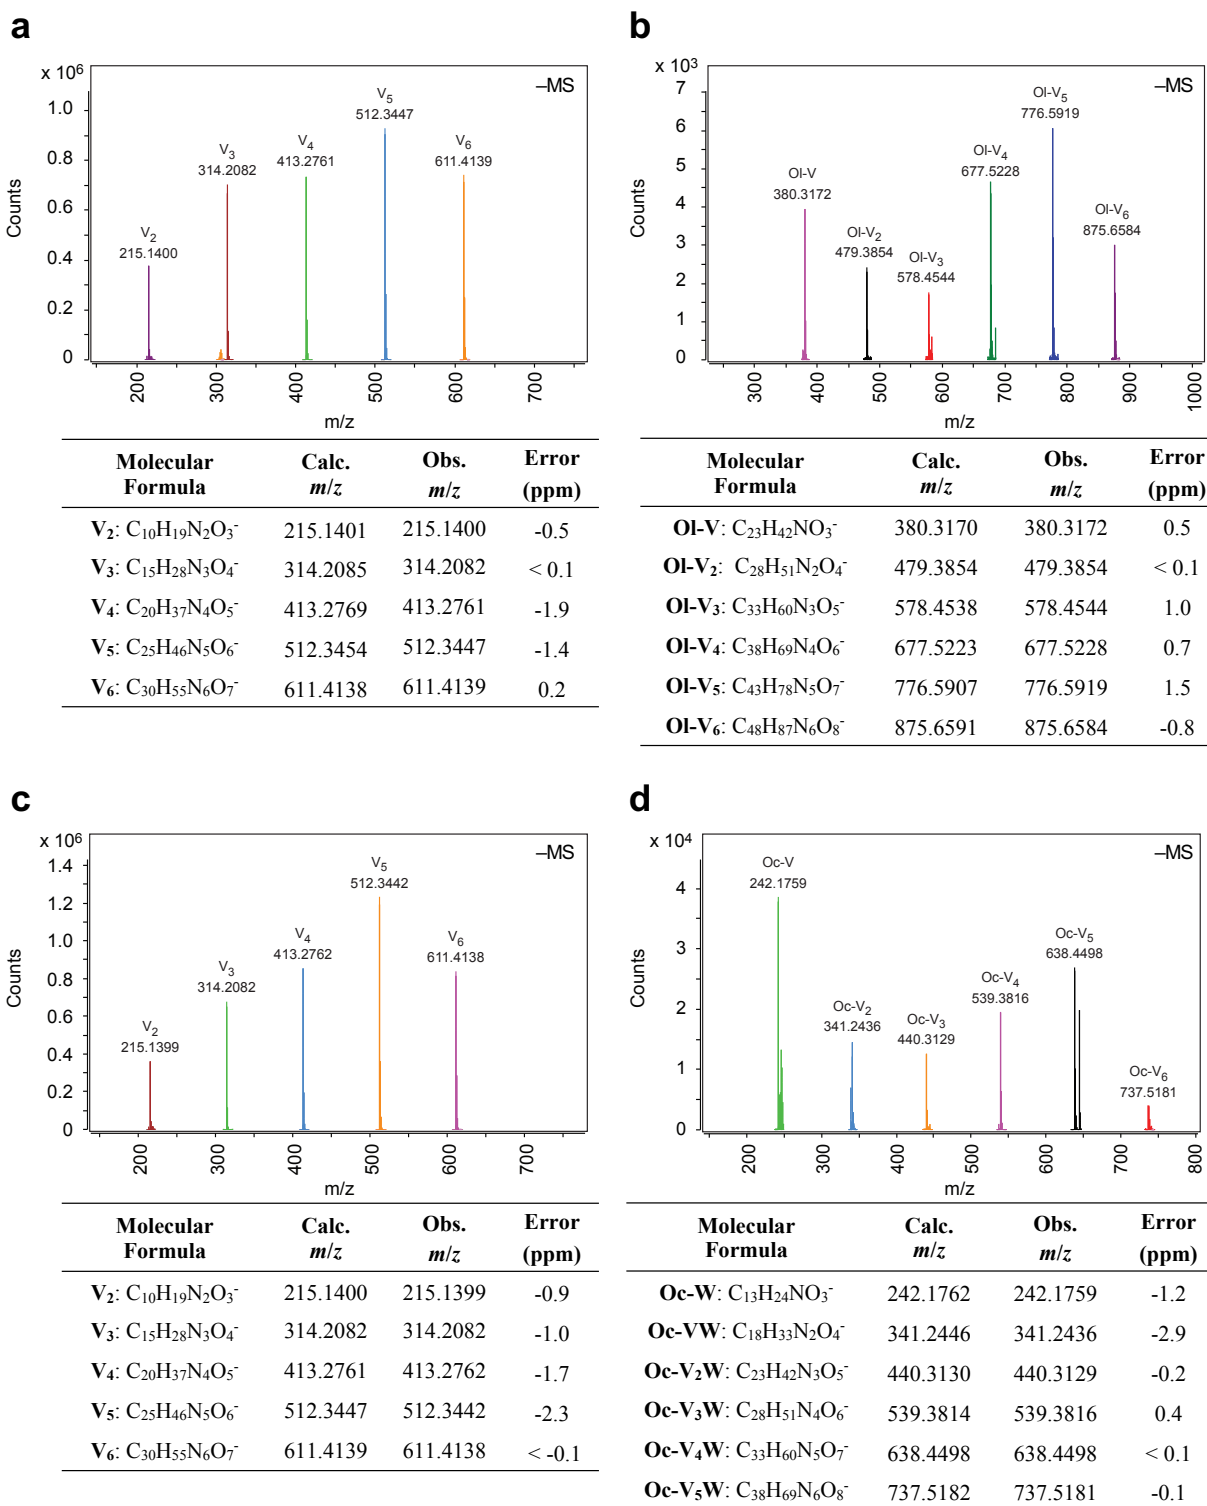

**Figure S1.** Selected ion-HRMS spectra ( $[M-H]^{-1}$ ) of reaction mixtures (24 h) initially consisting of Val-NCA (20 mM), tryptophan (W) (20 mM), EPPS (300 mM) and either oleic acid (20 mM) (**a** and **b**), or octanoic acid (20 mM) (**c** and **d**). HRMS experiments were carried out in negative mode. Panels (**a**) and (**b**) show the oligo-V peptides observed in the presence of oleic acid. Panels (**c**) and (**d**) show the oligo-V peptides observed in the presence of octanoic acid. Ol- is oleoyl and Oc- is octanoyl.

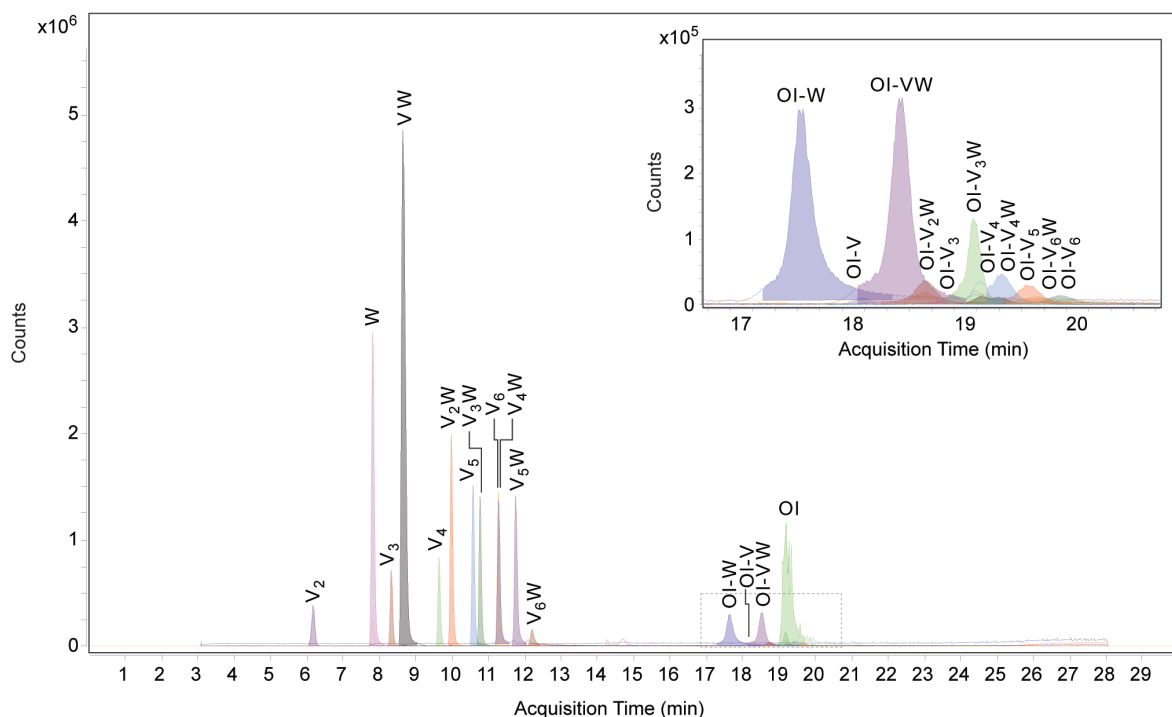

**Figure S2.** Overlay of HPLC extracted ion chromatogram of a reaction mixture initially containing Val-NCA, oleic acid and Trp, analysis of which is outlined in Fig. 1b-c in the main text.

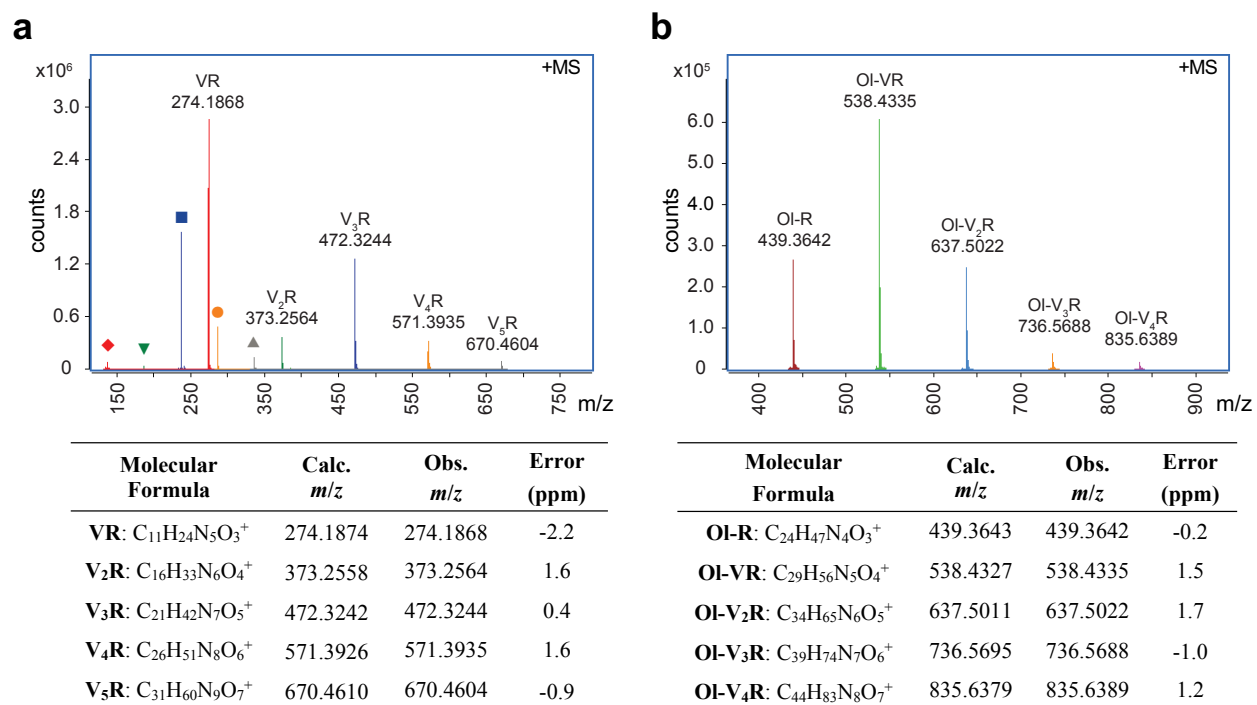

**Figure S3.** Selected ion-HRMS analyses of reaction mixtures (24 h) initially consisting of Val-NCA (20 mM), arginine (R) (20 mM), EPPS (300 mM) in oleic acid (20 mM) (a and b). HRMS experiments were carried out in positive mode. Panel (a) highlights the observed R-containing unacylated peptides in the presence of oleic acid. Panel (b) highlights the observed R-containing oleoylated (OI-) species. (a) symbols represent the observed second charge state  $m/z$  values of the peptide products (♦: VR, ▼: V<sub>2</sub>R, ■: V<sub>3</sub>R, ●: V<sub>4</sub>R, ▲: V<sub>5</sub>R).

**Mechanistic insights into the acylation of amino acids and peptides formed *in situ***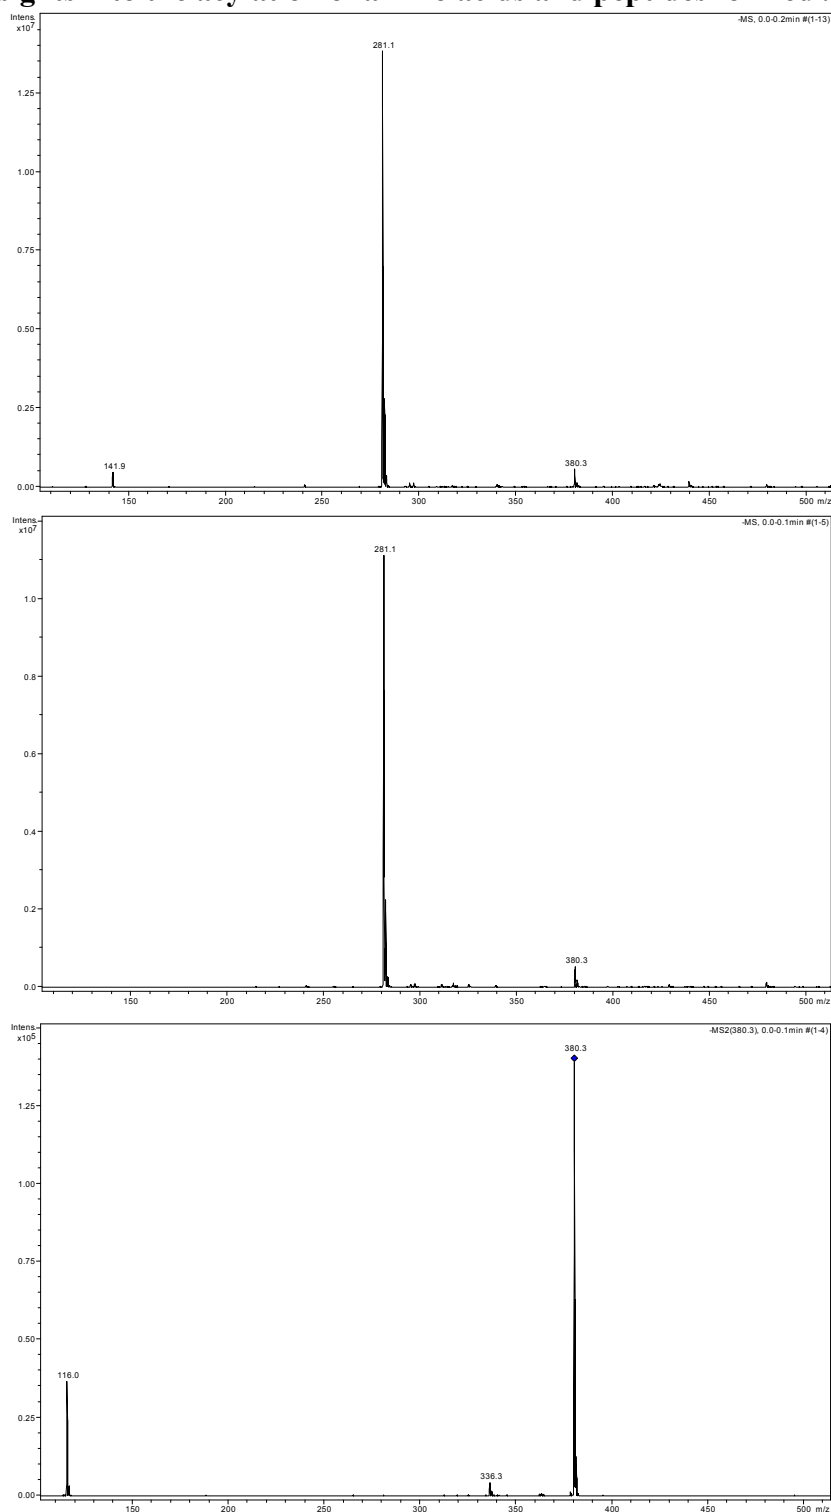

**Figure S4.** Mass spectroscopic investigation (in negative mode) of the formation of the carboxy-anhydride from Val-NCA, **1** (40 mM) and a mixture of oleic acid (1.5 M) and trimethylamine (1.5 M). ESI spectra of the crude reaction aliquot taken after (top) 15 min and (middle) 6 h of mixing. (Bottom) MS/MS product ion spectrum highlighting the isolated 380  $m/z$  species and its fragmentation products.  $[M - H]^{-1}$   $m/z$  values; Val-NCA (**1**): 142, oleic acid: 281,  $N^{\alpha}$ -oleoylvaline: 380, valine: 116, and decarboxylated  $N^{\alpha}$ -oleoylvaline: 336.

Below in Fig. S5 we show MS analyses of lower concentration aqueous reactions in which we used 40 mM  $^{18}\text{O}$ -enriched octanoic acid, 40 mM TEA, and  $\sim 20$  mM Val-NCA at initial pH 8.7. We observed the  $[\text{M} - \text{H}]^{-1} = 246$  m/z (Fig. S5, top) and  $[\text{M} - \text{H}]^{-1} = 244$  m/z (bottom) signals in negative ionization mode. The existence of the 246 m/z ( $^{18}\text{O}_2$ -oleylvaline) species, which fragments to yield a y-ion of 118 m/z (mono- $^{18}\text{O}$  enriched valine carboxylate) from amide bond dissociation and a decarboxylation product with 200 m/z (mono- $^{18}\text{O}$  enriched), suggests that the intramolecular rearrangement (path *i*) occurred. This result is in agreement with Fig. 3c of the main text. Interestingly, when isolating individual peaks within the isotope distribution around this species, we observed that the fragmentation of the 244 m/z signal ( $^{18}\text{O}$ -oleylvaline) yields y-ions of both 116 and 118 m/z, as well as the decarboxylated ions 200 and 198 m/z, respectively. Partitioning of  $^{18}\text{O}$  with the y-ion from fragmentation of  $^{18}\text{O}$ -oleylvaline would be expected for an anhydride that arises from  $^{18}\text{O}$ -oleate, since the enriched oxygen could be in either the bridging or non-bridging position in the mixed anhydride intermediate. The mono- $^{18}\text{O}$ -oleate needed to generate this species could arise from an impurity in the enriched preparation of  $^{18}\text{O}_2$ -oleic acid (Fig. S6, bottom) or from the hydrolysis of the anhydride generated by the reaction of  $^{18}\text{O}_2$ -oleate with Val-NCA. In fact, during

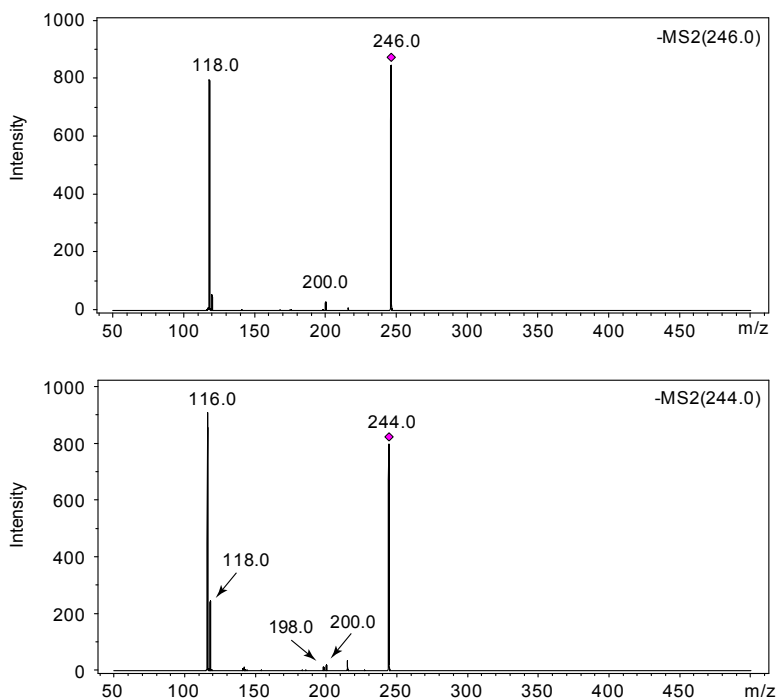

**Figure S5.** Mechanistic investigation of the formation of a mixed anhydride from Val-NCA and  $^{18}\text{O}$ -enriched octanoic acid. (Top and bottom) MS/MS product ion spectra highlighting the isolated  $^{18}\text{O}$ -enriched species and their fragmentation products.

the direct MS injection of a crude reaction (Fig. S6), we did observe an increase in the abundance of the 145 m/z peak corresponding to mono- $^{18}\text{O}$ -oleate, suggesting that a pathway for hydrolysis of the mixed anhydride exists in a reaction containing Val-NCA.

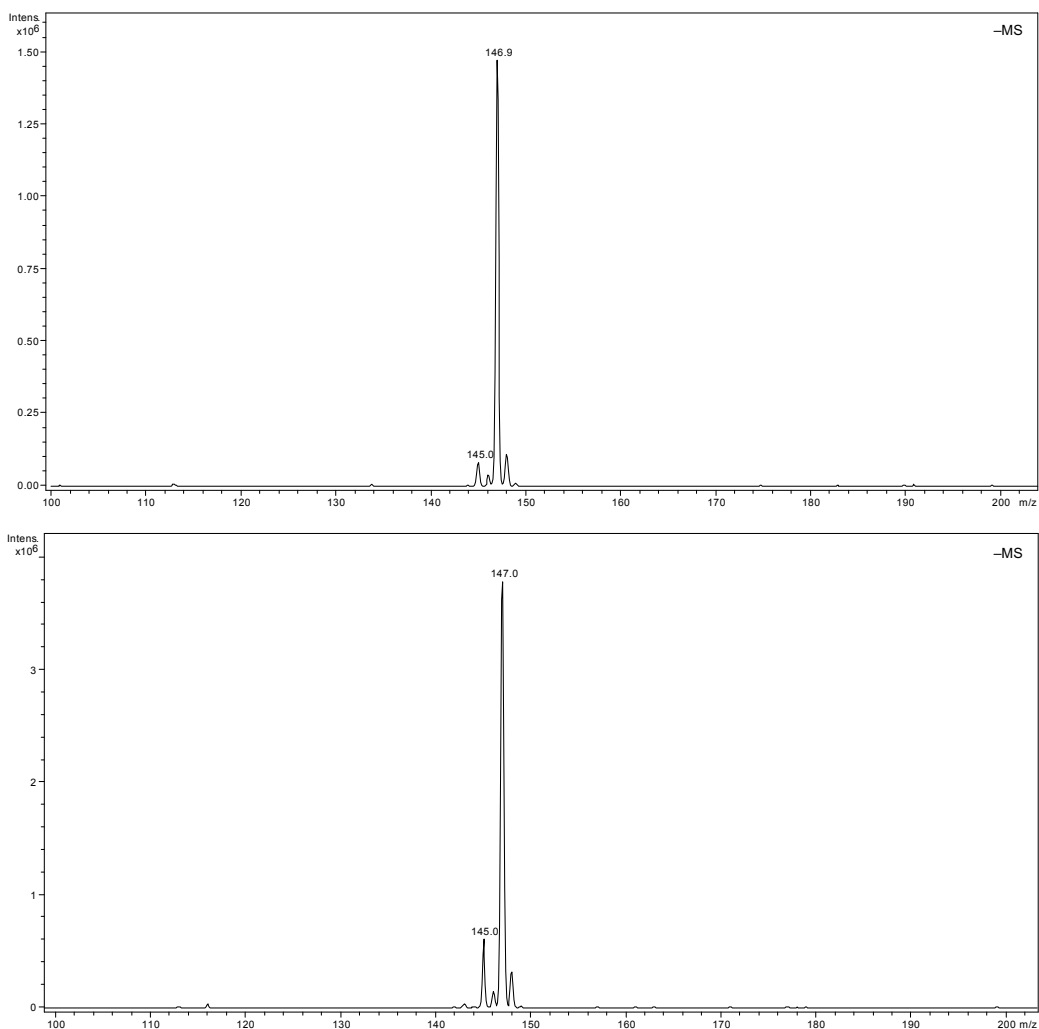

**Figure S6.** Low-resolution MS spectra of  $^{18}\text{O}_2$ -oleic acid (top) before the reaction was initiated and (bottom) after being mixed (as a triethylammonium salt at ca. pH 8.5 and 20 °C) with Val-NCA.



## Hydrolysis of Val-NCA

Val-NCA (**1**) hydrolyzes rapidly under our reaction conditions. In aqueous buffer at pH 8.5, in the absence of both the fatty acid and free AA, the observed rate constant for hydrolysis,  $k_{\text{obs-h}}$ , of **1** was measured as ca.  $1 \text{ min}^{-1}$  by  $^1\text{H}$  NMR spectroscopy (Fig. S7).<sup>1</sup> Our hydrolysis study was carried out as follows: At  $15 \text{ }^\circ\text{C}$ , a  $0.14 \text{ M}$   $d_8$ -THF solution of **1** ( $0.6 \text{ mL}$ ) was added quickly into a vigorously stirred NaEPPS solution ( $300 \text{ mM}$ , pH 8.5,  $11.4 \text{ mL}$ ) to give a  $0.007 \text{ M}$  solution of **1**, an initial concentration for which the NCA polymerization would be negligible.<sup>1</sup> Reaction aliquots ( $1 \text{ mL}$ ) taken over a 2 min period were quenched by addition to  $0.05 \text{ mL}$  TFA in a  $4\text{-mL}$  glass vial, and the unreacted **1** was recovered by  $\text{CDCl}_3$  ( $0.6 \text{ mL}$ ) extraction (vortex for 1 min). For each sample, the organic layer was removed using a gas-tight Hamilton syringe and transferred into a  $1\text{-mL}$  vial containing  $50 \text{ mg}$   $\text{Na}_2\text{SO}_4$ . After being dried over  $\text{Na}_2\text{SO}_4$ , the  $\text{CDCl}_3$  solution (ca.  $5 \text{ mL}$ ) was transferred into an NMR tube, and the  $^1\text{H}$  NMR spectrum was acquired over 256 scans. The area under the  $-\text{CH}_3$  signals of **1** (two apparent doublets,  $\delta$  ca.  $1.1 \text{ ppm}$ ) was used to determine the relative mol% of **1**, by normalizing to the peak area of the  $d_8$ -THF residual solvent peak ( $\delta$  ca.  $1.7 \text{ ppm}$ ).

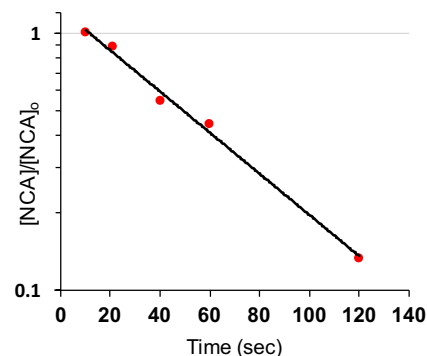

**Figure S7.** Hydrolysis of Val-NCA (**1**) at  $15 \text{ }^\circ\text{C}$  and pH 8.5. Observed rate constant for hydrolysis,  $k_{\text{obs-h}}$  of **1** is  $0.018 \text{ sec}^{-1}$ . ( $R^2 = 0.993$ ).

## Standard curves of FRET efficiencies

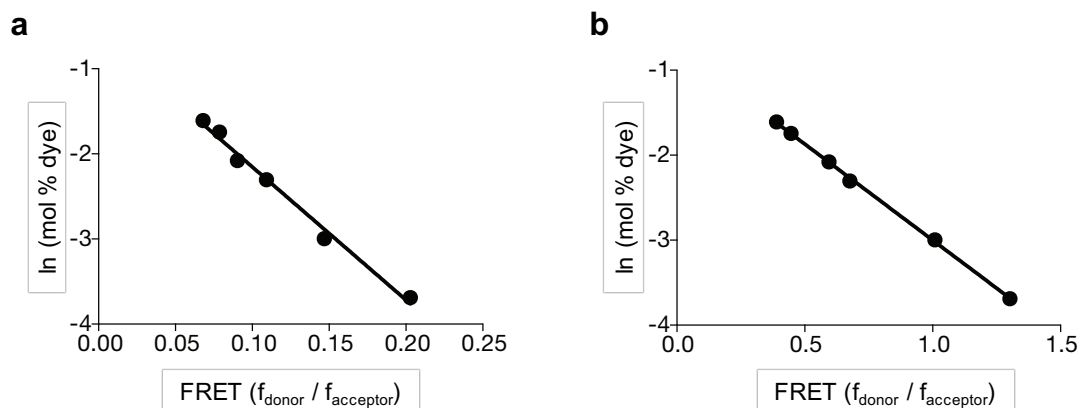

**Figure S8.** Standard curve of FRET efficiency as a function of mol% FRET dyes in (a) oleate and (b) POPC vesicles ( $R^2 > 0.99$ ).

### Synthesis of *N*<sup>α</sup>-octanoyl-L-valine

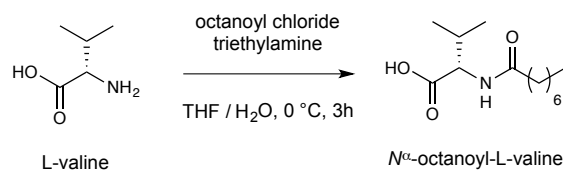

To a stirred suspension of L-valine (175 mg, 1.5 mmol, 1.5 equiv) in a mixture of THF (8 mL) and H<sub>2</sub>O (1.5 mL) was added octanoyl chloride (0.17 mL, 1.0 mmol, 1 equiv) and triethylamine (0.6 mL, 4.0 mmol, 4 equiv) at 0 °C. The reaction mixture was stirred for 3 h, then concentrated under reduced pressure. The resulting material was dissolved in CH<sub>2</sub>Cl<sub>2</sub> (100 mL) and washed with water. The organic phase was concentrated under reduced pressure, and the resulting crude material was purified by combiflash silica gel chromatography (CH<sub>2</sub>Cl<sub>2</sub> / MeOH step gradient). The product fraction was concentrated under reduced pressure to afford *N*<sup>α</sup>-octanoyl-L-valine (120 mg, 51% yield, based on octanoyl chloride).

<sup>1</sup>H NMR (400 MHz, CDCl<sub>3</sub>) δ 7.90 (br s, 1H), 6.15 (d, *J* = 8.5 Hz, 1H), 4.59 (dd, *J* = 8.5, *J* = 4.5 Hz, 1H), 2.27 (t, *J* = 7.0 Hz, 2H), 2.24 (m, 1H), 1.64 (br quin, *J* = 7.0 Hz, 2H), 1.36–1.21 (m, 8H), 0.98 (d, *J* = 7.0 Hz, 3H), 0.95 (d, *J* = 7.0 Hz, 3H), and 0.88 (br t, *J* = 7.0 Hz, 3H); <sup>13</sup>C NMR (100 MHz, CDCl<sub>3</sub>) δ 175.3, 174.1, 57.0, 36.7, 31.7, 31.0, 29.2, 29.0, 25.7, 22.6, 19.0, 17.7, and 14.0; LRMS (ESI): calcd for [C<sub>13</sub>H<sub>25</sub>NO<sub>3</sub> – (H<sup>+</sup>)]<sup>–</sup> 242.1762, found 242.0.

### Synthesis of *N*<sup>α</sup>-oleoyl-L-tryptophan

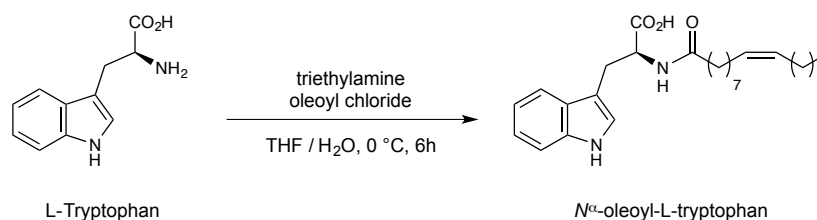

To a stirred suspension of L-tryptophan (200 mg, 1.0 mmol, 1.5 equiv) in a mixture of THF (8.0 mL) and H<sub>2</sub>O (1.5 mL) was added oleoyl chloride (0.22 mL, 0.7 mmol, 1 equiv) and triethylamine (0.6 mL, 4.2 mmol, 6 equiv) at 0 °C. The reaction mixture was stirred for 6 h, then concentrated under reduced pressure. The resulting material was dissolved in CH<sub>2</sub>Cl<sub>2</sub> (100 mL) and washed with water. The organic phase was concentrated under reduced pressure, and the resulting crude material was purified by combiflash silica gel chromatography (CH<sub>2</sub>Cl<sub>2</sub>/MeOH

step gradient). The product fraction was concentrated under reduced pressure to afford  $N^{\alpha}$ -oleoyl-L-tryptophan (205 mg, 63% yield, based on oleoyl chloride). The  $^1\text{H-NMR}$  spectrum of the isolated product acquired in  $\text{CDCl}_3$  matched the reported spectrum.<sup>2</sup> **LRMS** (ESI): calcd for  $[\text{C}_{29}\text{H}_{44}\text{N}_2\text{O}_3 - (\text{H}^+)]^-$  467.3279, found 467.3. The molar extinction coefficient at 280 nm absorbance ( $\epsilon_{280}$ ) of  $N^{\alpha}$ -oleoyl-L-tryptophan dissolved in MeOH was measured as  $5700 \text{ M}^{-1}\text{cm}^{-1}$  (see the UV spectrum below). In addition,  $\epsilon_{280}$  of L-tryptophan dissolved in MeOH/ $\text{H}_2\text{O}$  (1:1) was measured as  $5980 \text{ M}^{-1}\text{cm}^{-1}$ .

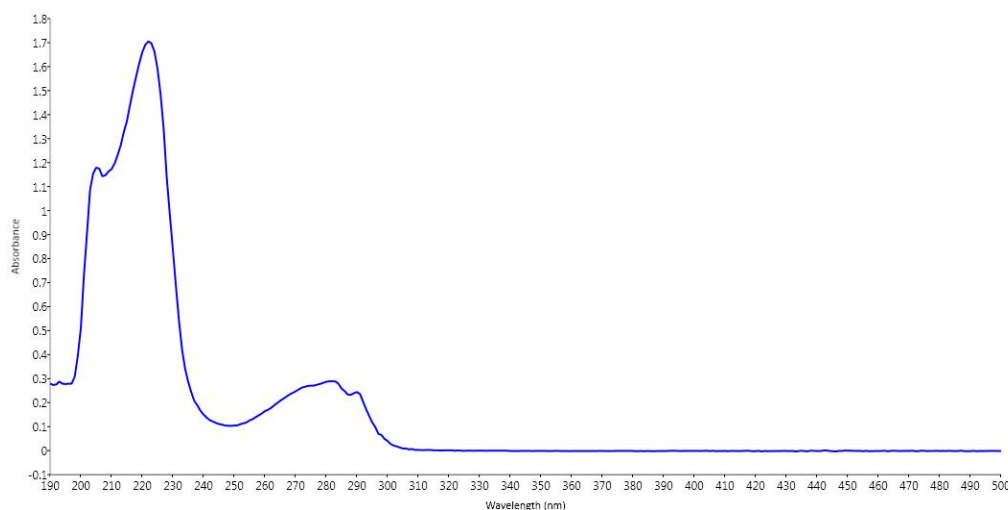

These  $\epsilon_{280}$  values were used to determine the yields of the  $N^{\alpha}$ -acylated and unacylated Trp-containing products as described in the main text. Purification was achieved using combiflash reversed-phase C18 chromatography ( $\text{H}_2\text{O}/\text{CH}_3\text{CN}$  or  $\text{H}_2\text{O}/\text{MeOH}$  gradient).

### Synthesis of Octanoic-1,1- $^{18}\text{O}_2$ acid

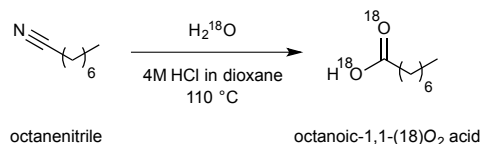

Inside of a glove box, a 15 mL high pressure reaction vessel equipped with a magnetic stir bar, was charged with octanenitrile (550  $\mu\text{L}$ , 3.6 mmol, 1 equiv),  $\text{H}_2^{18}\text{O}$  (97%, 500  $\mu\text{L}$ , 25 mmol, 7 equiv) and 4M HCl in dioxane (3.5 mL). The vessel was sealed tightly with a Teflon cap, then taken out of the glove box and placed in a 110  $^\circ\text{C}$ -oil bath. After being stirred for 4 h, the reaction mixture was allowed to cool to room temperature and filtered through a PTFE filter (pore size 0.22

$\mu\text{m}$ ). Diethyl ether (8 mL) was added to the filtrate, and the resulting mixture was vortexed in a Falcon tube for ca. 1 min. The organic layer was transferred into another Falcon tube and cooled to 0 °C. Anhydrous triethylamine (1 mL) was added dropwise to remove most of the excess HCl present in the organic liquid as an insoluble triethylammonium chloride salt. The Falcon tube was then vortexed for ca. 1 min and placed in a –30 °C freezer. After 30 min, the tube was centrifuged to pellet the solid material. The supernatant was collected, dried over  $\text{Na}_2\text{SO}_4$  and concentrated under reduced pressure. The resulting oil was subjected to combiflash silica gel chromatography (with 210–215 nm UV detection) using a hexane/diethyl ether elution mixture (95:5 to 75:25 gradient) to afford octanoic-1,1- $^{18}\text{O}_2$  acid (320 mg, 61% yield, 87% enrichment by HRMS).

$^1\text{H}$  NMR (400 MHz,  $\text{CDCl}_3$ )  $\delta$  2.36 (t,  $J = 7.5$  Hz, 2H), 1.64 (br q,  $J = 7.5$ , 2H), 1.37–1.24 (m, 8H), and 0.89 (t,  $J = 7.0$  Hz, 3H);  $^{13}\text{C}$  NMR (100 MHz,  $\text{CDCl}_3$ )  $\delta$  179.8, 34.2, 31.9, 29.2, 29.1, 24.9, 22.8 (6x  $\text{CH}_2$ ) and 14.3; HRMS (ESI): calcd for  $[\text{C}_8\text{H}_{16}^{18}\text{O}_2 - (\text{H}^+)]^-$  147.1162, found 147.1191.

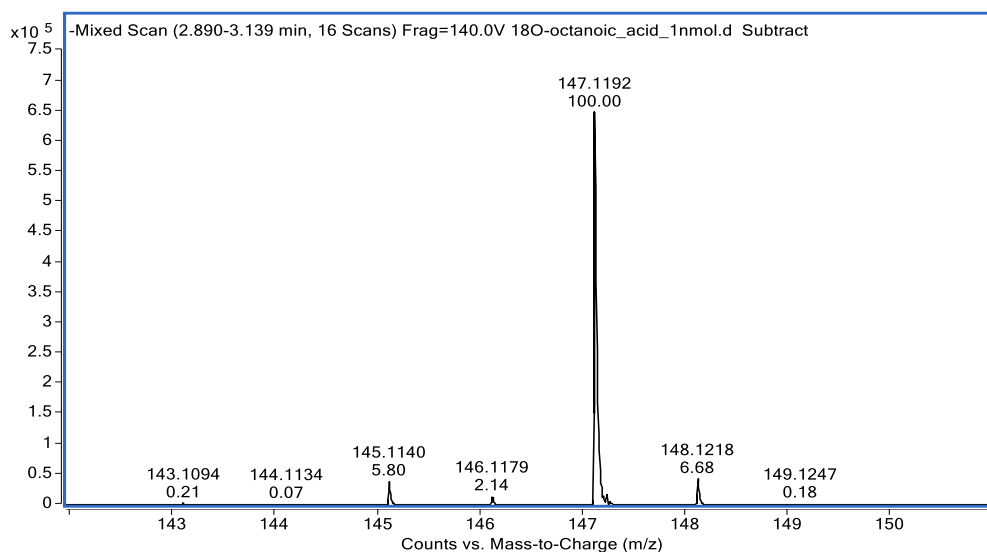

| <b>m/z calc</b> | <b>m/z obs</b> | <b>natural</b> | <b>enriched</b> | <b>enriched norm.</b> |
|-----------------|----------------|----------------|-----------------|-----------------------|
| 143.1078        | 143.1094       | 91.15          | 0.18            | 0.21                  |
| 144.1112        | 144.1134       | 8.11           | 0.06            | 0.07                  |
| 145.1132        | 145.1140       | 0.69           | 5.04            | 5.80                  |
| 146.1159        | 146.1179       | 0.04           | 1.86            | 2.14                  |
| 147.1184        | 147.1192       | 0              | 86.90           | 100                   |
| 148.1209        | 148.1218       | 0              | 5.80            | 6.68                  |
| 149.1272        | 149.1247       | 0              | 0.16            | 0.18                  |

## Synthesis of $N^\alpha$ -oleoyl-L-arginine

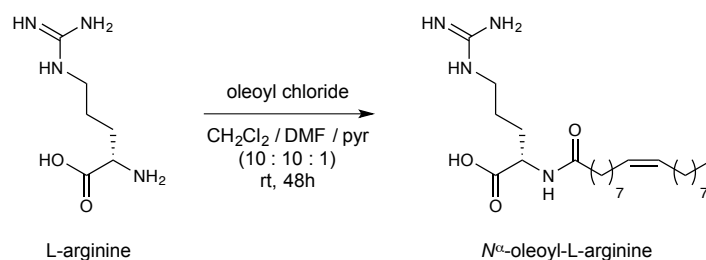

To a stirred suspension of L-arginine (180 mg, 1.0 mmol, 2 equiv) in  $\text{CH}_2\text{Cl}_2$  (3.5 mL), DMF (3.5 mL) and pyridine (0.4 mL) was added oleoyl chloride (0.17 mL, 0.5 mmol, 1 equiv) at room temperature. The reaction mixture was stirred for 48 h, then diluted with 1N HCl (50 mL) and extracted with  $\text{CH}_2\text{Cl}_2$  (100 mL). The organic phase was concentrated under reduced pressure, and the resulting crude material was purified by combiflash reversed-phase C18 chromatography (solvent A: water, solvent B: 0.1% TFA/acetonitrile, gradient from 40% to 100% solvent B). The aqueous product fraction was transferred into a Falcon tube and freeze-dried to afford  $N^\alpha$ -oleoyl-L-arginine (54 mg, 26% yield).

**$^1\text{H}$  NMR** (400 MHz,  $\text{CD}_3\text{OD}$ )  $\delta$  5.35 (overlapped m, 2H), 4.43 (dd,  $J = 8.5, 5.5$  Hz, 1H), 3.27–3.15 (m, 2H), 2.26 (t,  $J = 7.5$  Hz, 2H), 2.08–2.00 (m, 4H), 1.98–1.89 (m, 1H), 1.77–1.70 (m, 1H), 1.70–1.58 (m, 4H), 1.40–1.24 (overlapped m, 20H), and 0.90 (t,  $J = 7.0$  Hz, 3H) (exchangeable protons were not observed);  **$^{13}\text{C}$  NMR** (100 MHz,  $\text{CD}_3\text{OD}$ )  $\delta$  176.6, 175.4, 158.8, 131.0, 130.9, 53.2, 42.0, 37.0, 33.2, 31.0<sup>+</sup>, 31.0<sup>-</sup>, 30.8, 30.6, 30.5<sup>+</sup>, 30.5<sup>-</sup>, 30.4, 31.0, 30.0, 28.3<sup>+</sup>, 28.3<sup>-</sup>, 27.1, 26.5, 24.0, and 14.6; **HRMS** (ESI): calcd for  $\text{C}_{24}\text{H}_{46}\text{N}_4\text{O}_3 \cdot \text{H}^+$  439.3643, found 439.3639.

## References

1. At pH 6.5, the  $k_{\text{obs-h}}$  of **1** has previously been determined to be  $0.07 \text{ min}^{-1}$  by capillary electrophoresis: Plasson, R.; Biron, J.-P.; Cottet, H.; Commeyras, A.; Taillades, J. *J. Chromatogr., A* **2002**, *952*, 239–248.
2. Osornio, Y. M.; Uebelhart, P.; Bosshard, S.; Konrad, F.; Siegel, J. S. & Landau, E. M., *J. Org. Chem.* **2012**, *77*, 10583–10595.

**$^1\text{H}$  NMR Spect.** (400 MHz,  $\text{CDCl}_3$ )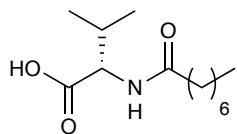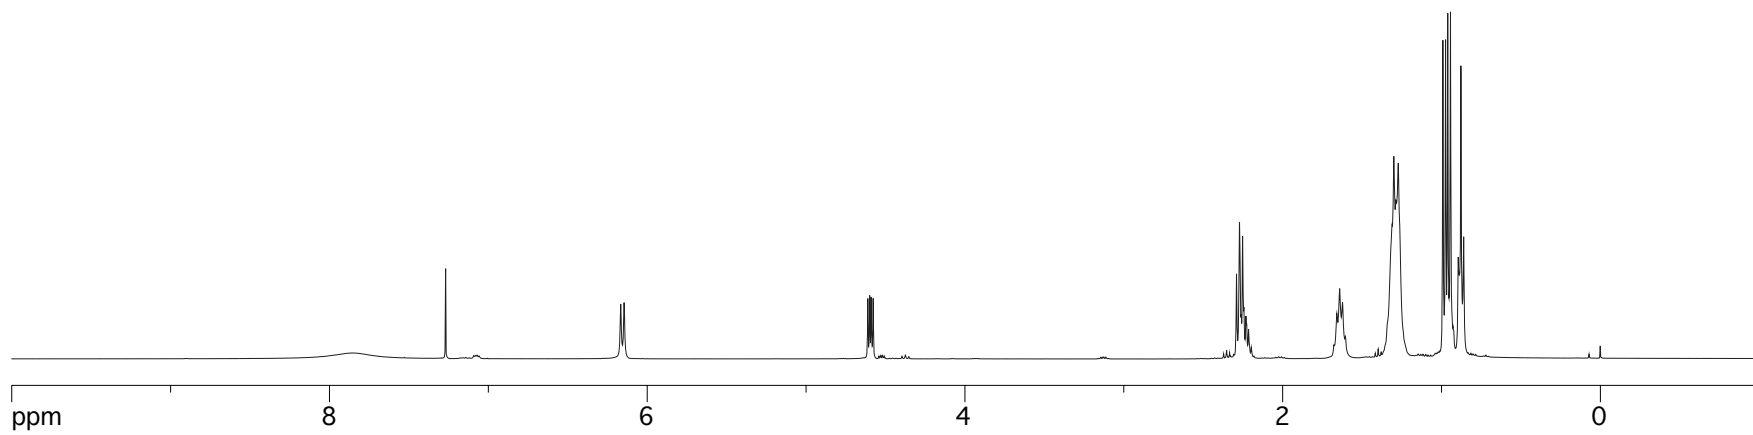

**$^{13}\text{C}$  NMR Spect.** (100 MHz,  $\text{CDCl}_3$ )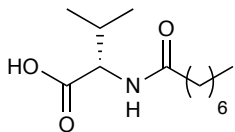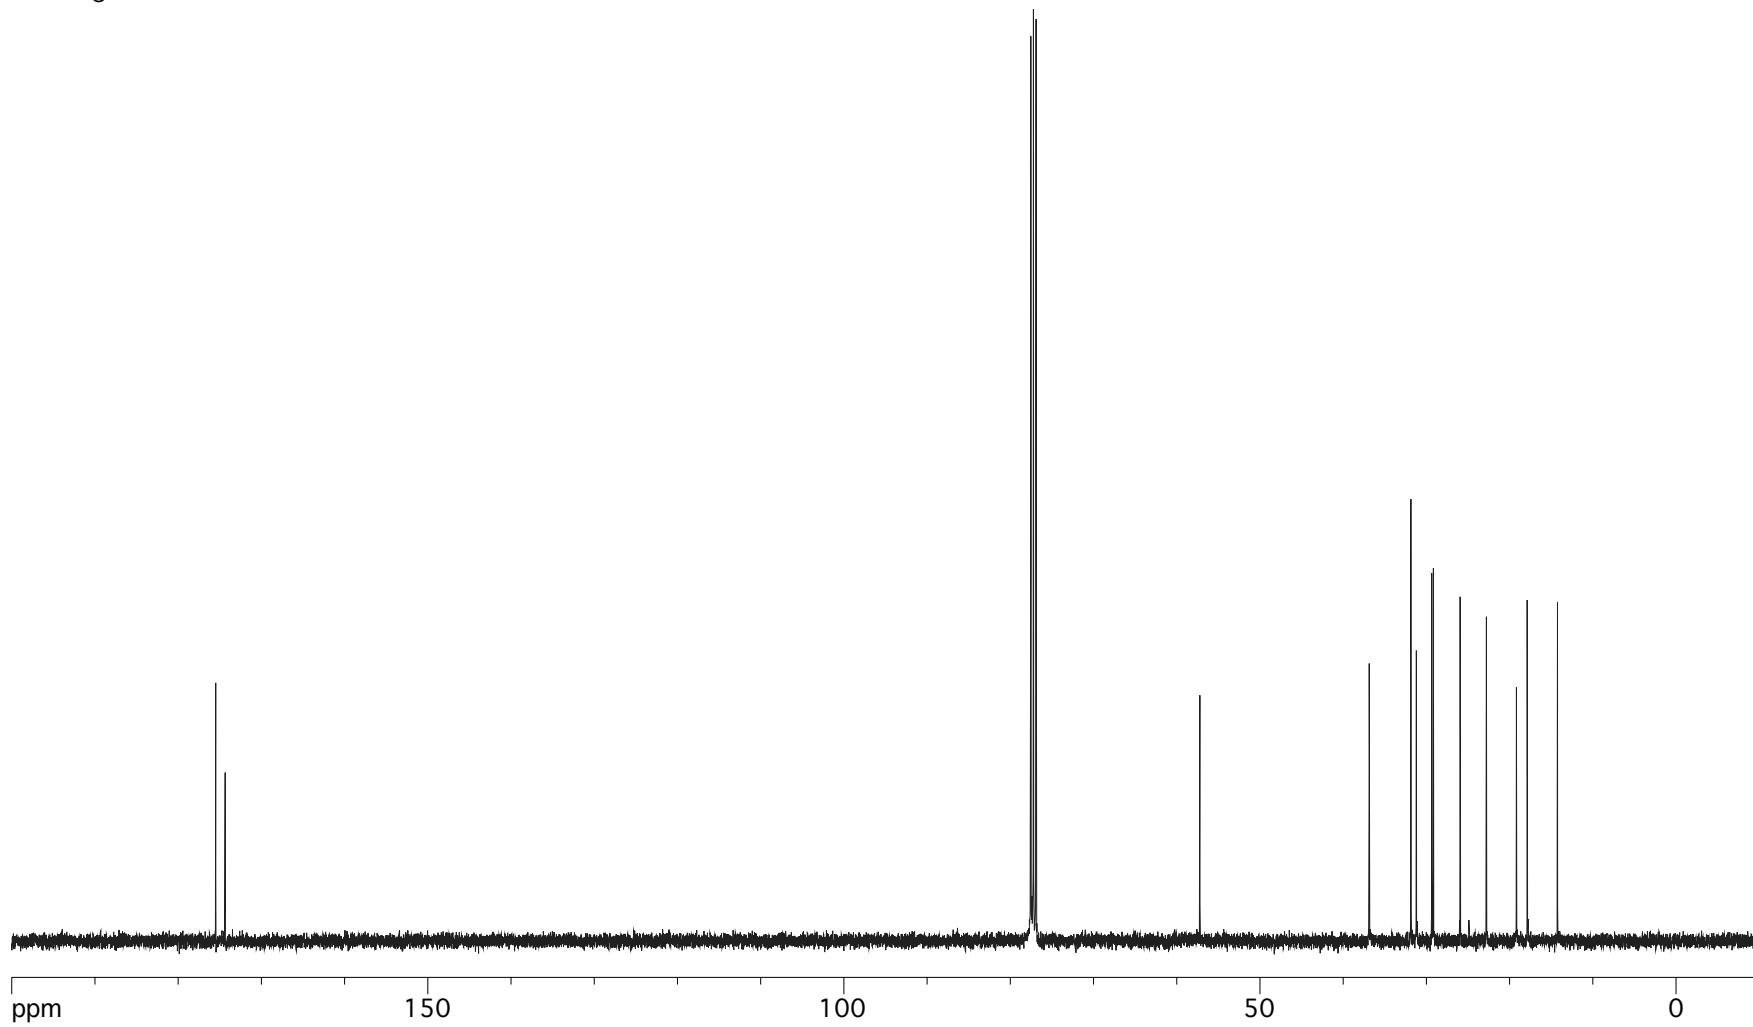

**$^1\text{H}$  NMR Spect. (400 MHz,  $\text{CDCl}_3$ )**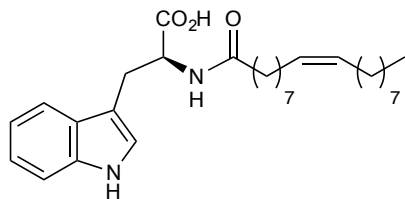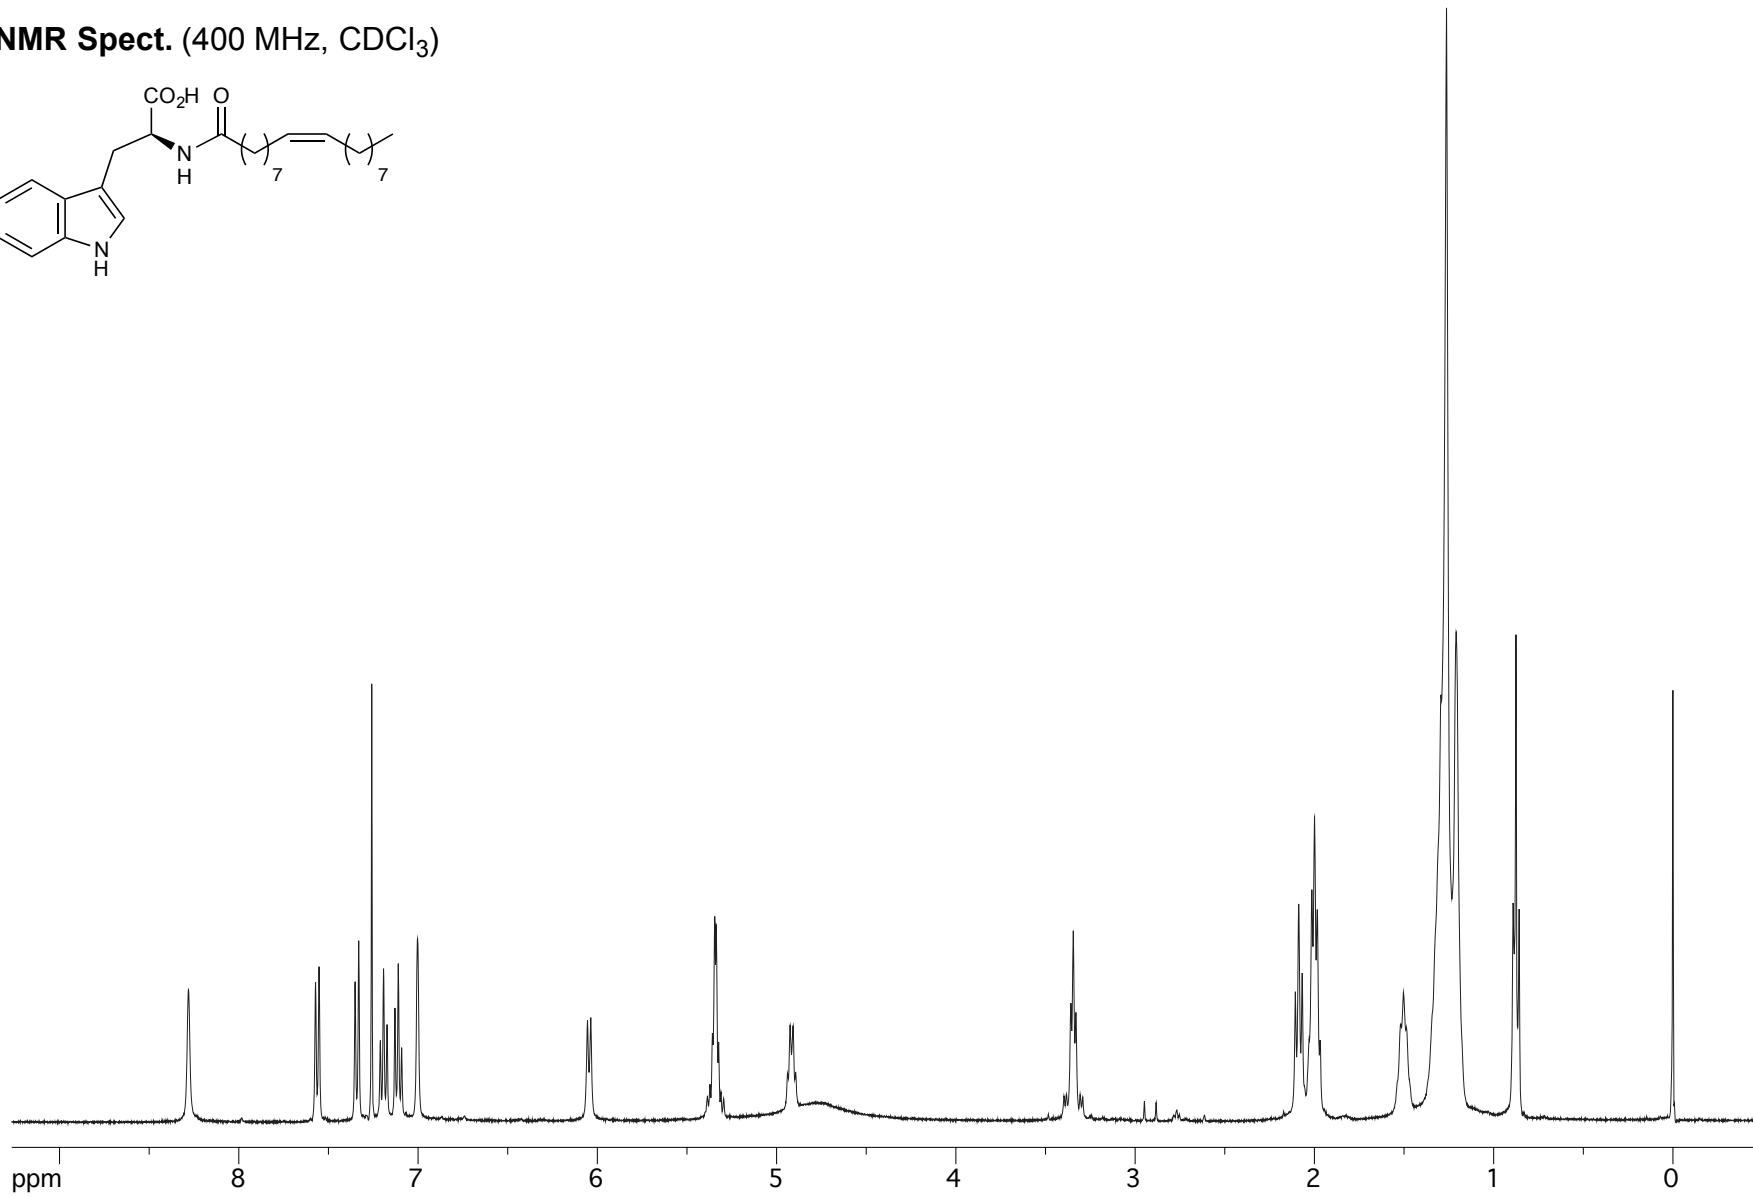



**$^1\text{H}$  NMR Spect.** (400 MHz,  $\text{CDCl}_3$ )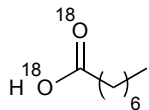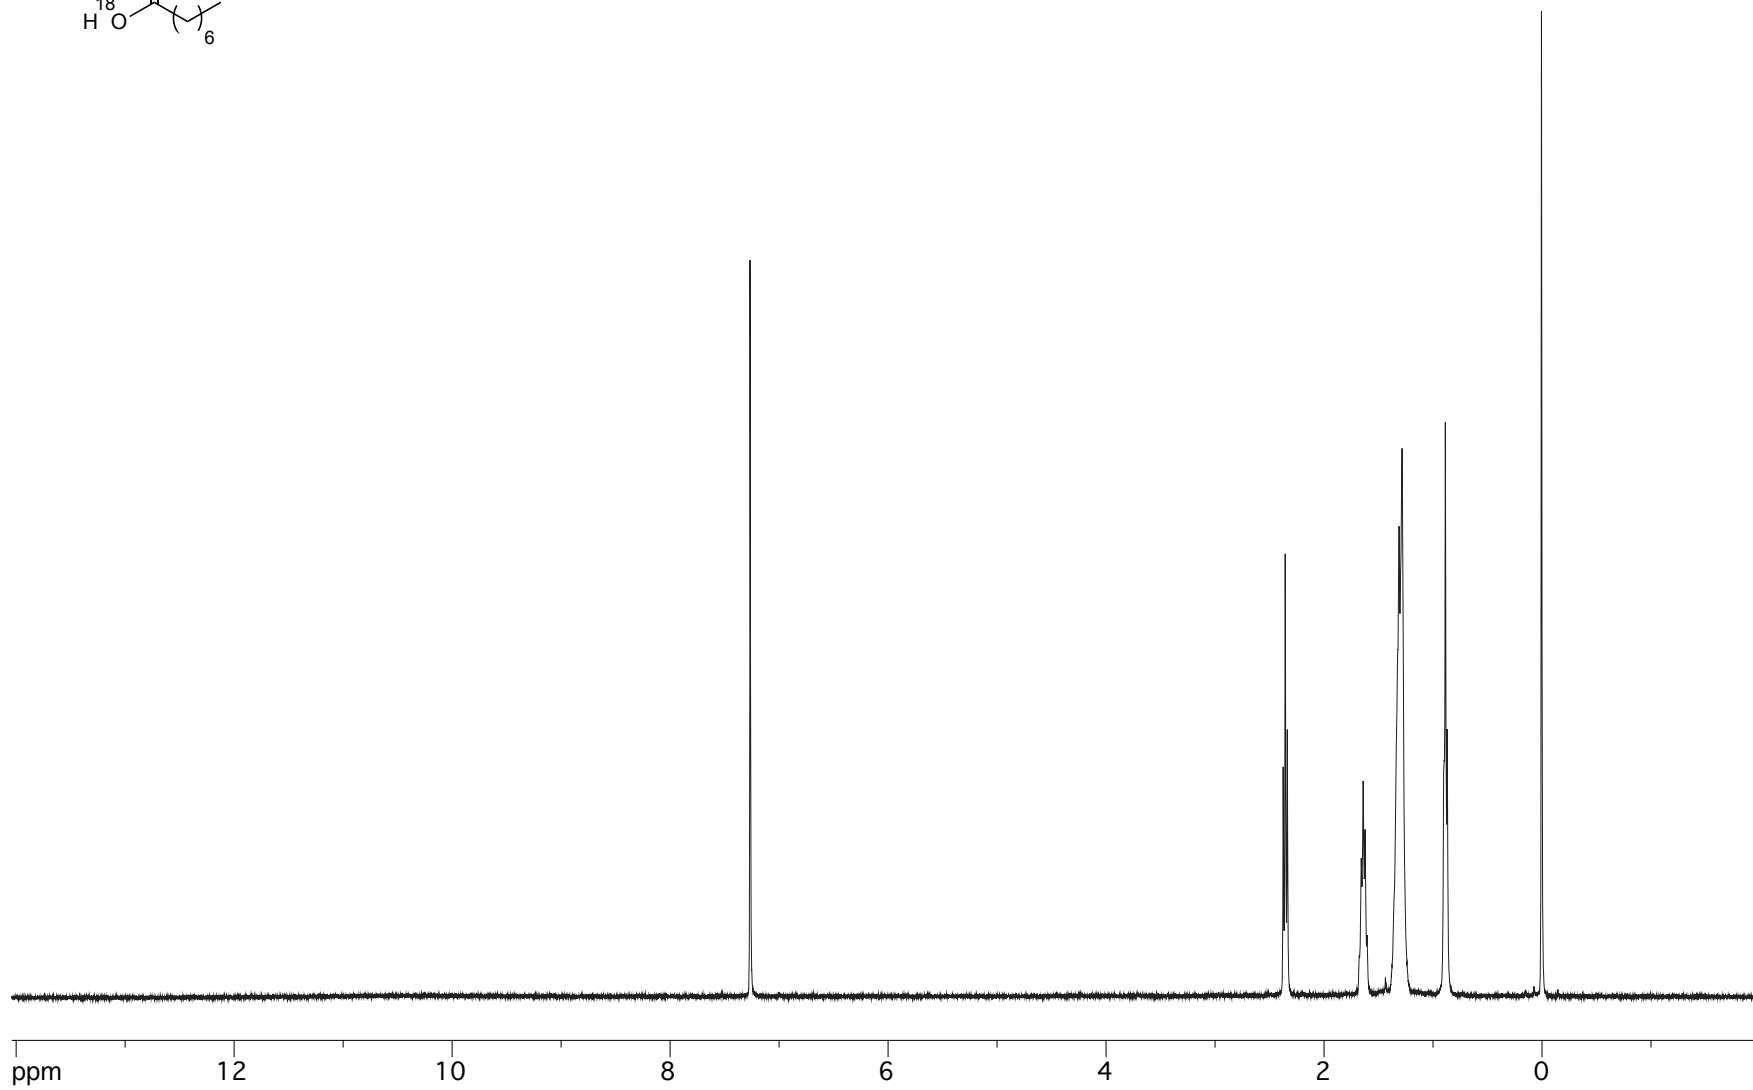

**$^{13}\text{C}$  NMR Spect. (100 MHz,  $\text{CDCl}_3$ )**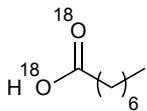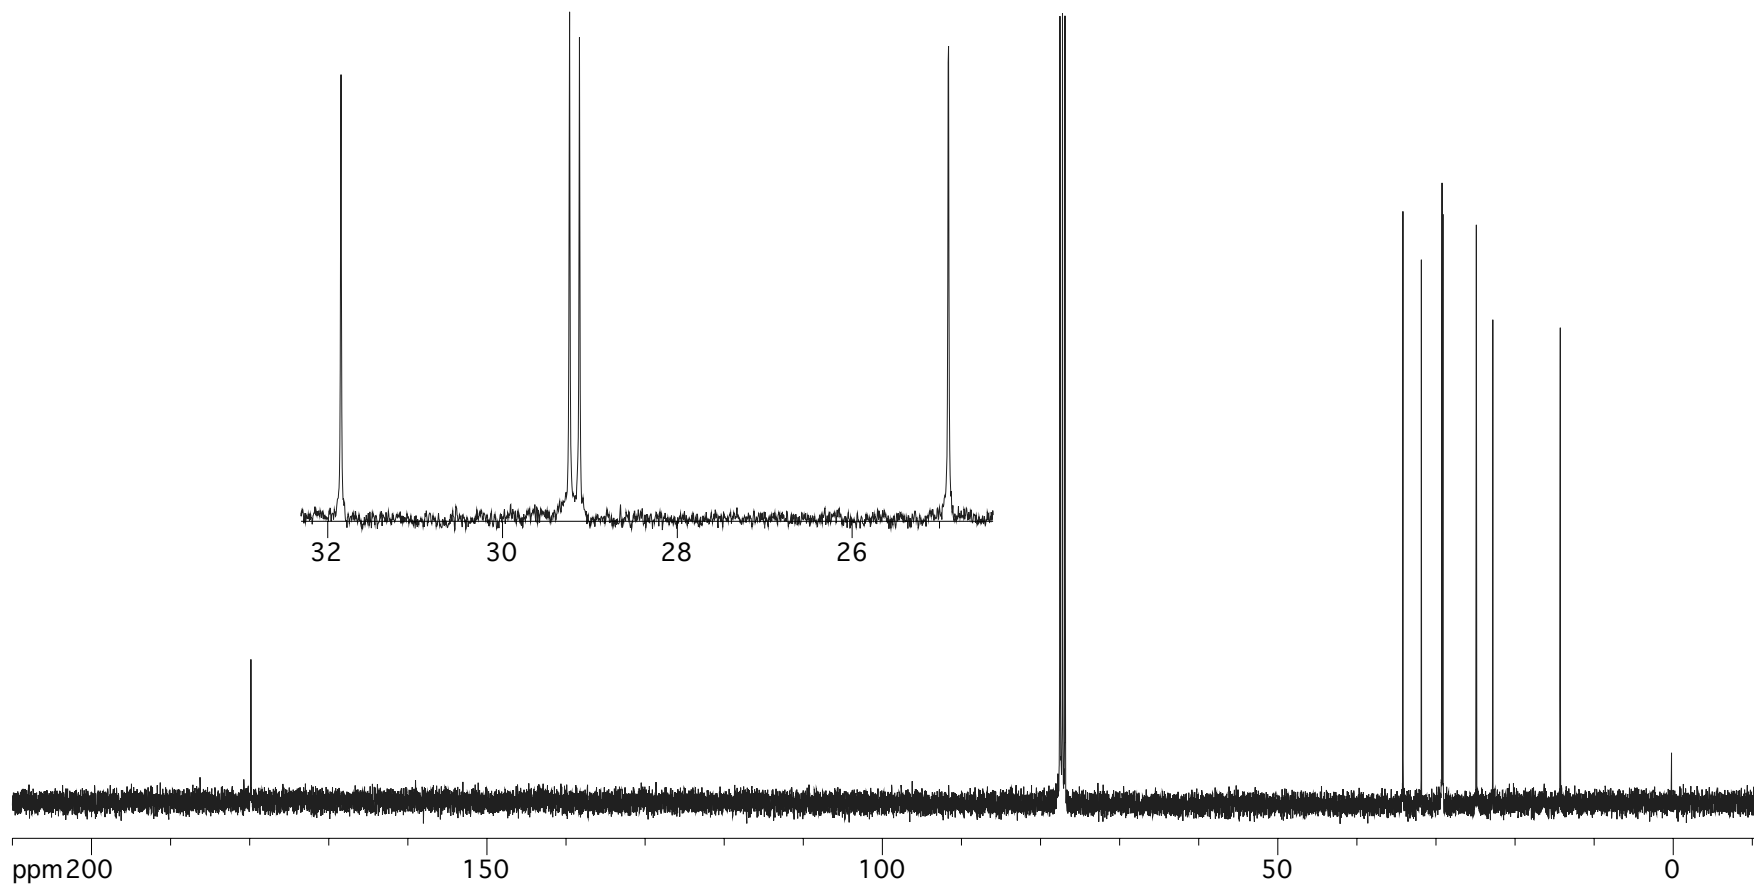

**$^1\text{H}$  NMR Spect. (400 MHz,  $\text{CD}_3\text{OD}$ )**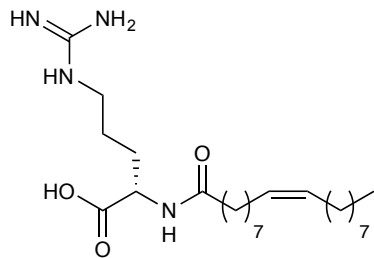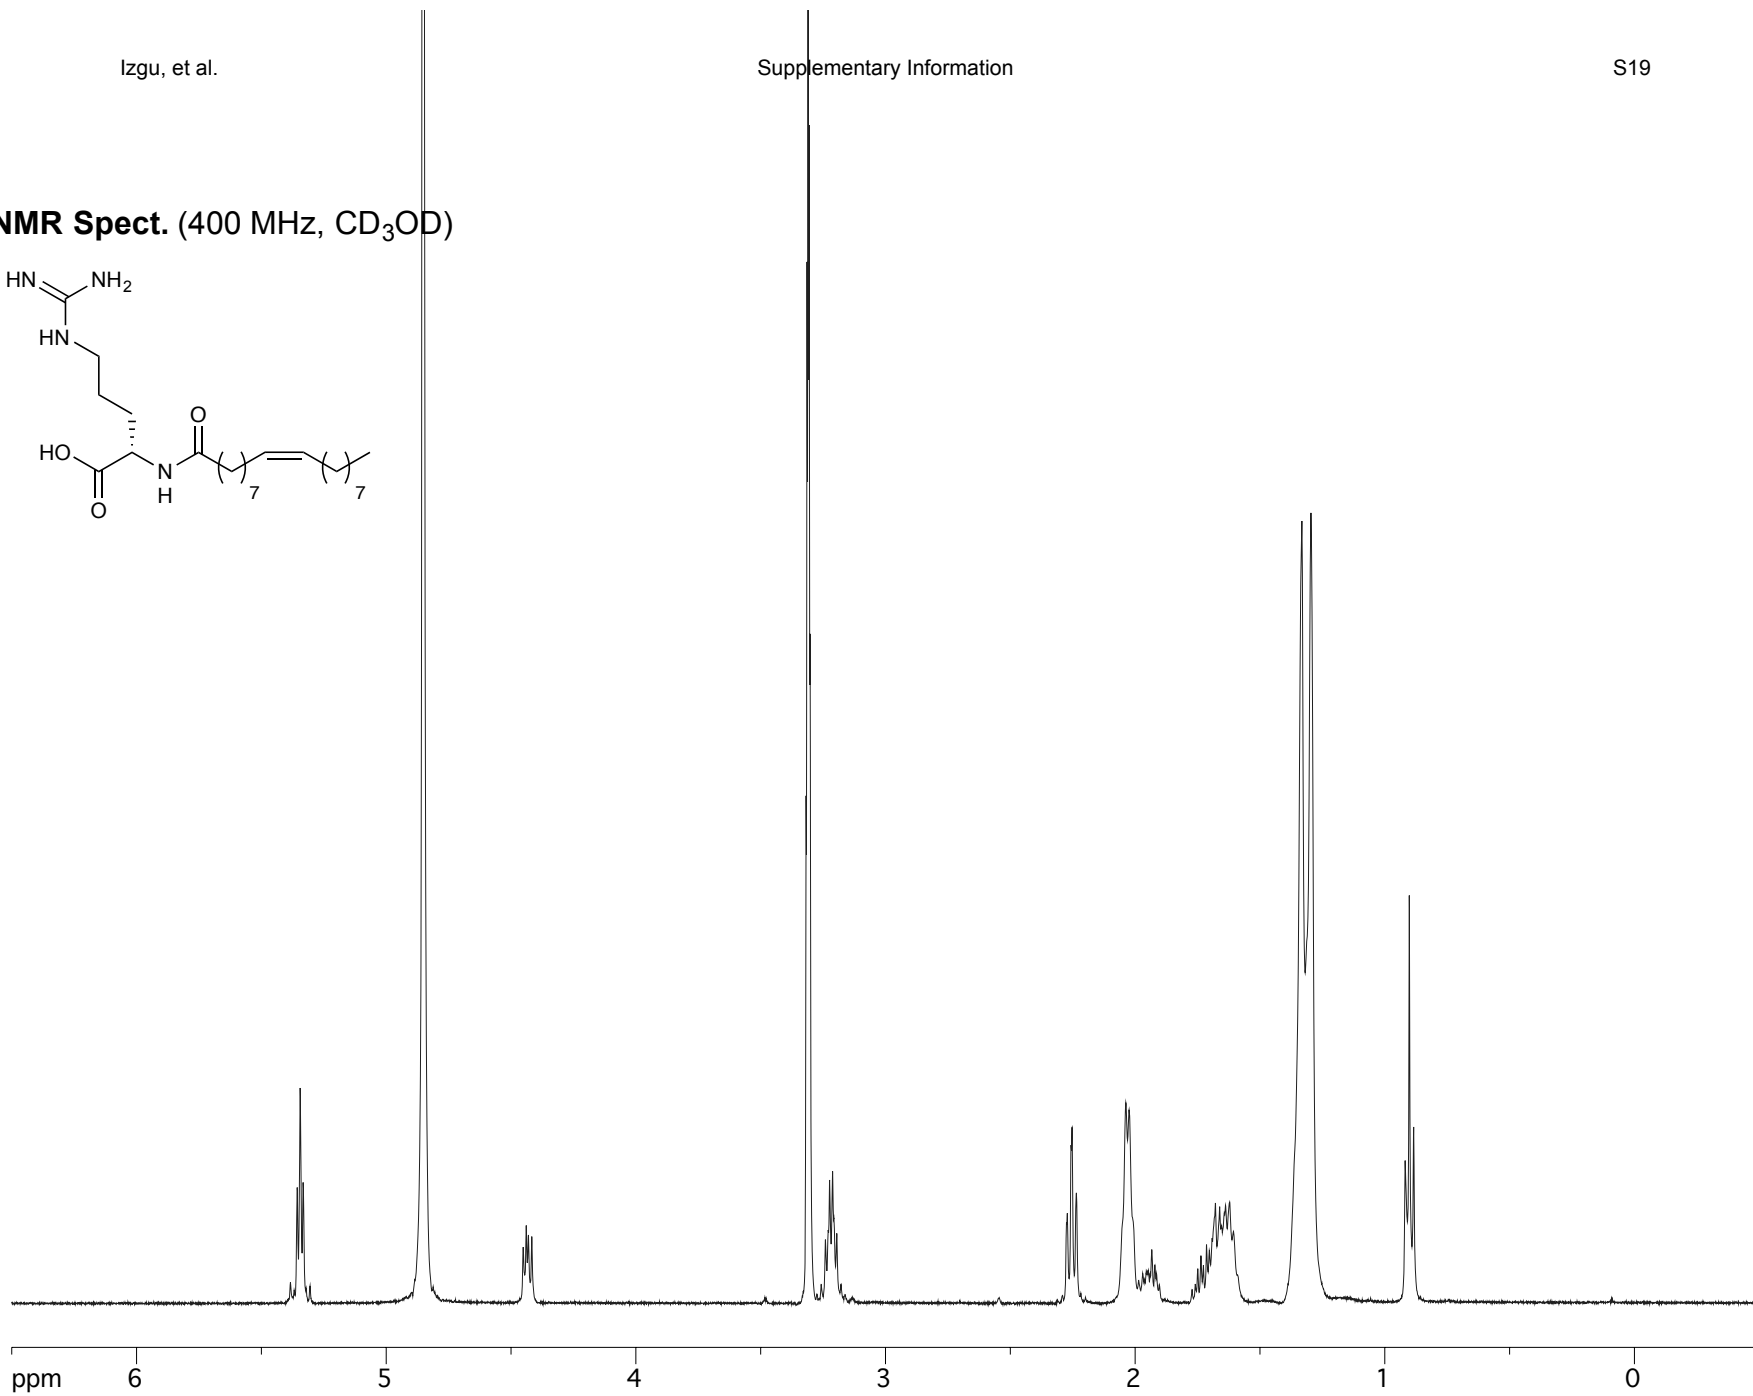

**$^{13}\text{C}$  NMR Spect.** (100 MHz,  $\text{CD}_3\text{OD}$ )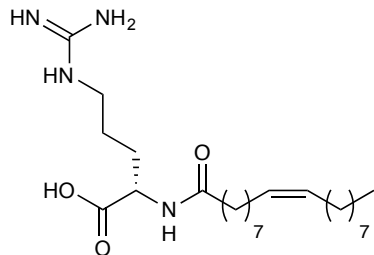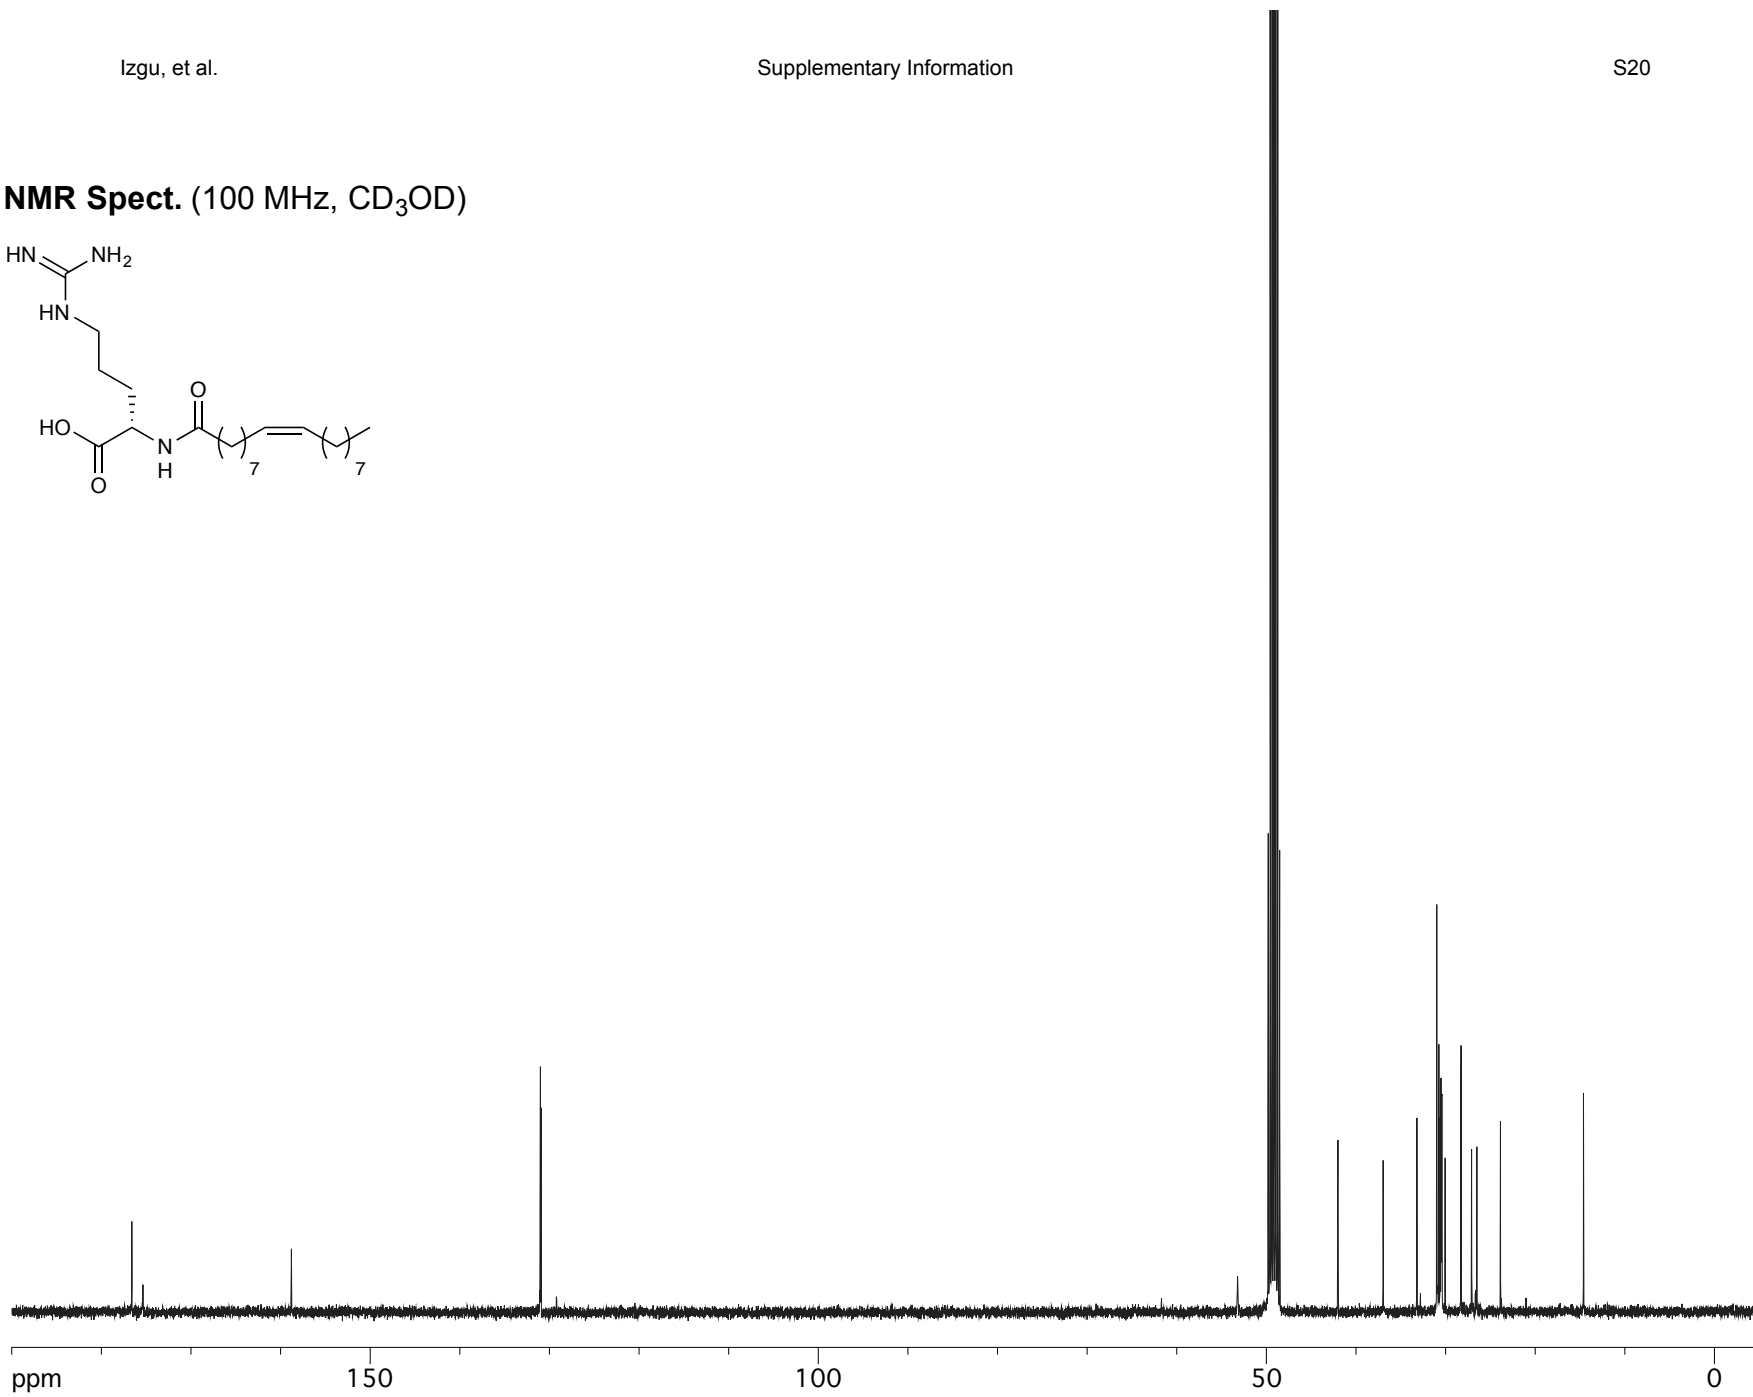

Supplement: ja6b08801_si_001.pdf [file ja6b08801_si_001.pdf]
